# Supplementary material for: Cassava Bagasse as a Low-Cost Substrate for Cellulase and Organic Acid Production Using Co-Cultivated Fungi
Source: MDPI journal article supplement (doi:10.3390/fermentation10010014), 2023-12-22
Supplement: s1 [file s1]

## Supplementary Data

### **Cassava Bagasse as a Low-Cost Substrate for Cellulase and Organic Acid Production using Co-Cultivated Fungi**

Analdi Farniga <sup>1</sup>, Phimrak Khaokhajorn <sup>2</sup> and Songsak Wattanachaisaereekul <sup>1,\*</sup>

<sup>1</sup> School of Food Industry, King Mongkut's Institute of Technology Ladkrabang,  
1 Chalong krung Rd., Ladkrabang, Bangkok 10520, Thailand

<sup>2</sup> Pilot Plant Development and Training Institute, King Mongkut's University of  
Technology Thonburi, 49 Soi Thianthale 25, Bangkhunthian-Chaithale Rd., Thakham,  
Bangkhunthian, Bangkok 10150, Thailand

\* Correspondence: songsak.wa@kmitl.ac.th

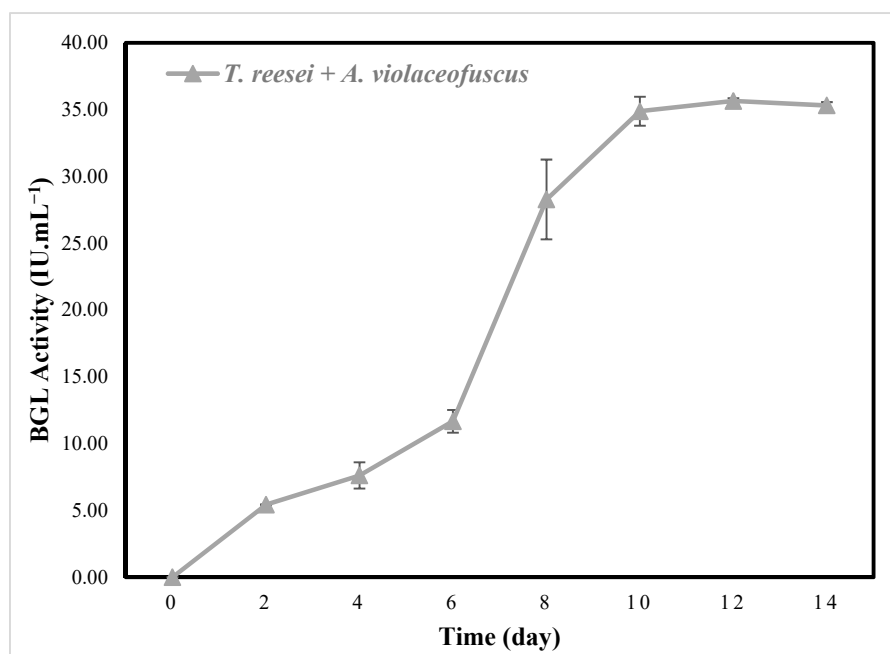

**Figure S1.** BGL production from *Trichoderma reesei* RUT-C30 and *Aspergillus violaceofuscus* co-cultivation under SMF using avicel PASC substrate. All experiments were performed in duplicate, and error bars indicate the standard deviation.

**Table S1.** List of fungal isolates and their cellulase enzymatic indices on avicel PASC substrate.

| Number | Isolate code | Fungi                             | Cellulase enzymatic index  |
|--------|--------------|-----------------------------------|----------------------------|
| 1      | FI-01        | <i>Aspergillus niger</i>          | 1.74 ± 0.04 <sup>a</sup>   |
| 2      | FI-02        | <i>Penicillium</i> sp.            | 1.07 ± 0.02 <sup>de</sup>  |
| 3      | FI-03        | <i>Penicillium</i> sp.            | 1.12 ± 0.03 <sup>cde</sup> |
| 4      | FI-04        | <i>Aspergillus niger</i>          | 1.34 ± 0.20 <sup>b</sup>   |
| 5      | FI-05        | <i>Penicillium sumatraensis</i>   | 1.00 ± 0 <sup>e</sup>      |
| 6      | FI-06        | <i>Penicillium</i> sp.            | 1.22 ± 0.02 <sup>bcd</sup> |
| 7      | FI-07        | <i>Aspergillus aculeatus</i>      | 1.13 ± 0.06 <sup>cde</sup> |
| 8      | FI-08        | NI                                | ND                         |
| 9      | FI-09        | NI                                | ND                         |
| 10     | FI-10        | NI                                | ND                         |
| 11     | FI-11        | <i>Aspergillus aculeatus</i>      | 1.24 ± 0.07 <sup>bcd</sup> |
| 12     | FI-12        | NI                                | ND                         |
| 13     | FI-13        | NI                                | ND                         |
| 14     | FI-14        | NI                                | ND                         |
| 15     | FI-15        | <i>Aspergillus violaceofuscus</i> | 1.31 ± 0.04 <sup>bc</sup>  |
| 16     | FI-16        | NI                                | ND                         |
| 17     | FI-17        | <i>Aspergillus oryzae</i>         | 1.07 ± 0 <sup>de</sup>     |
| 18     | FI-18        | NI                                | ND                         |
| 19     | FI-19        | NI                                | ND                         |
| 20     | FI-20        | <i>Aspergillus aculeatus</i>      | 1.23 ± 0.08 <sup>bcd</sup> |
| 21     | FI-21        | NI                                | ND                         |
| 22     | FI-22        | NI                                | ND                         |
| 23     | FI-23        | NI                                | ND                         |
| 24     | -            | <i>Trichoderma reesei</i> RUT-C30 | 1.11 ± 0.06 <sup>cde</sup> |

The analysis was carried out in triplicate. Different letters indicate statistically significant difference in means based on Tukey's HSD at a 95% confidence level. NI: Not Identified; ND: Not Detected.

**Table S2.** Cellulase activity of monocultures and mixed-cultures under SMF using avicel PASC substrate.

| Organism                                | <sup>1</sup> BGL<br>(IU.gds <sup>-1</sup> ) |
|-----------------------------------------|---------------------------------------------|
| <i>Trichoderma reesei</i> RUT C-30 (TR) | 1.83 ± 0.142                                |
| <i>Aspergillus violaceofuscus</i> (AV)  | 28.48 ± 0.295                               |
| <i>Aspergillus niger</i> (AN)           | 29.15 ± 4.22                                |
| Mixed culture (TR+AV)                   | 39.73 ± 3.910                               |
| Mixed culture (TR+AN)                   | 31.21 ± 6.20                                |
| Mixed culture (AV+AN)                   | 30.90 ± 4.11                                |

<sup>1</sup>Enzyme activity analysis was carried out in triplicate.
